# Supplementary material for: Spatial Context of Immune Checkpoints as Predictors of Overall Survival in Patients with Resectable Colorectal Cancer Independent of Standard Tumor–Node–Metastasis Stages
Source: PubMed Central journal article supplement (PMC11589669; doi:10.1158/2767-9764.crc-24-0270), 2024-11-26
Supplement: crc-24-0270_figure_s1_suppsf1.pdf [file crc-24-0270_figure_s1_suppsf1.pdf]

Figure S1

**A**

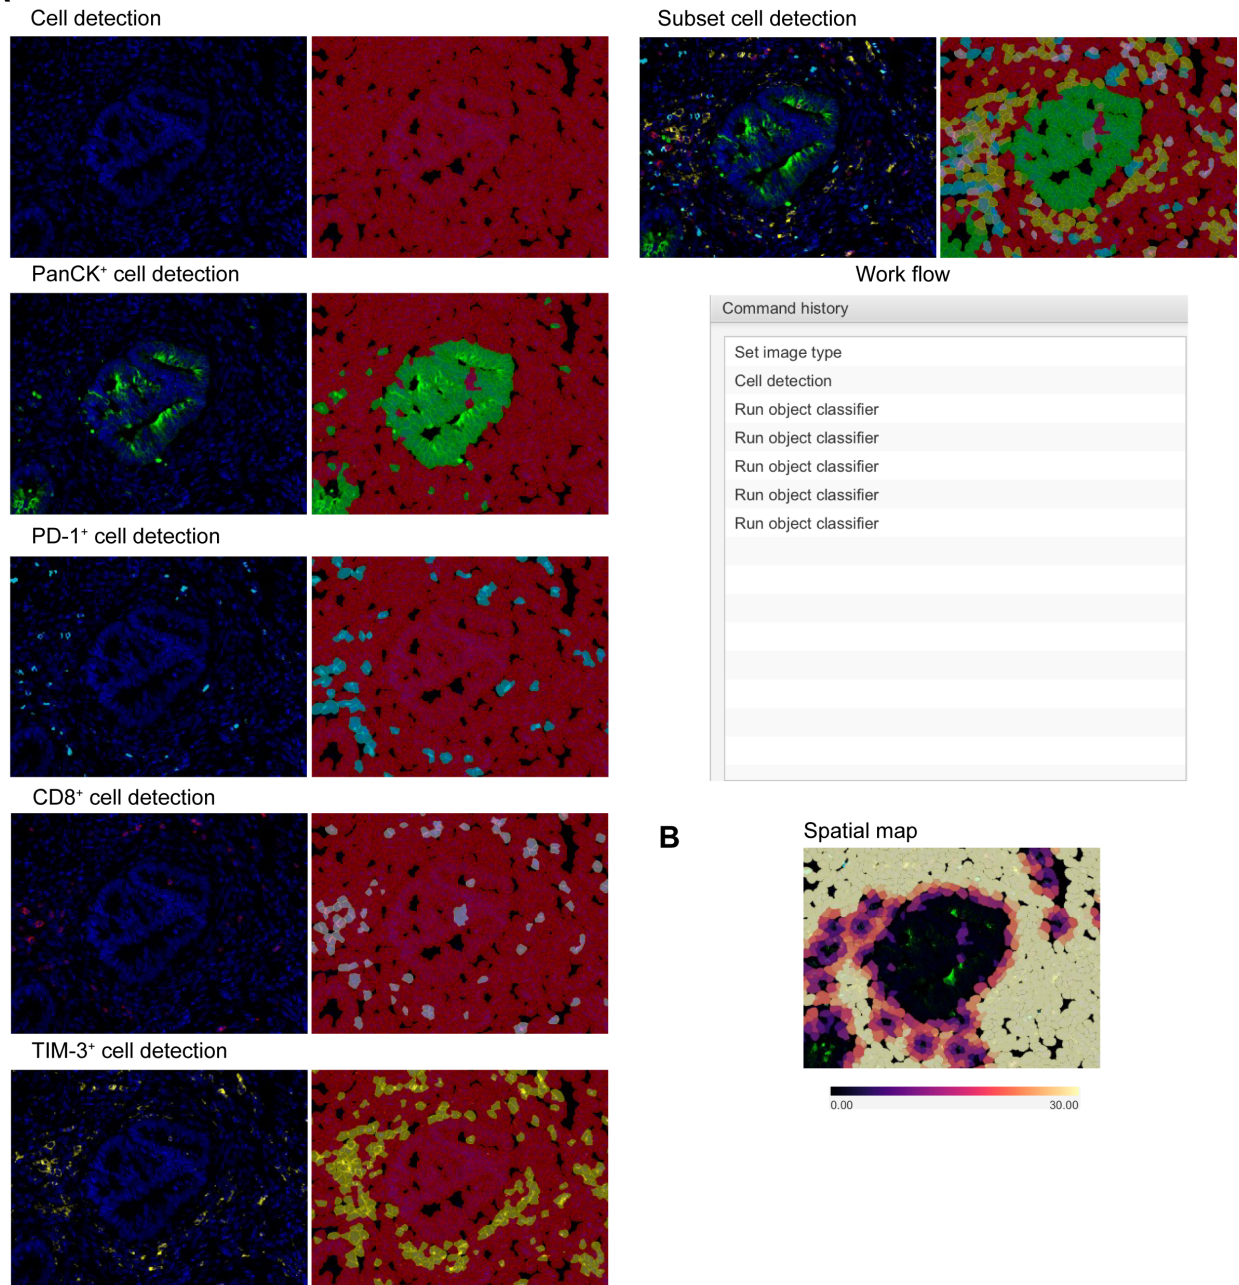

**Figure S1**

**Workflow of mIHC analysis. A,** Positive cells were determined using 'Load classifier' module of Qupath.

**B,** Representative image of spatial analysis results.
