# Supplementary material for: Spatial Context of Immune Checkpoints as Predictors of Overall Survival in Patients with Resectable Colorectal Cancer Independent of Standard Tumor–Node–Metastasis Stages
Source: PubMed Central journal article supplement (PMC11589669; doi:10.1158/2767-9764.crc-24-0270), 2024-11-26
Supplement: crc-24-0270_figure_s2_suppsf2.pdf [file crc-24-0270_figure_s2_suppsf2.pdf]

Figure S2

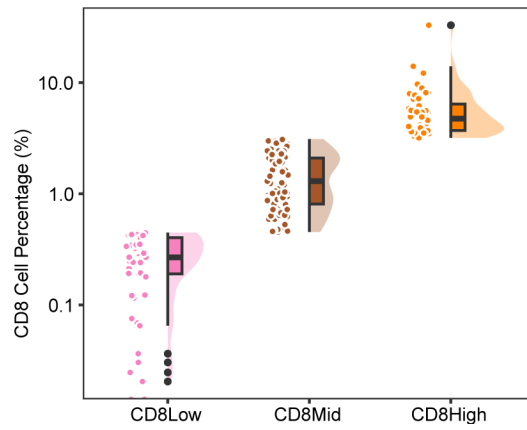

**Figure S2**

**Patients were divided into three groups based on the percentages of CD8<sup>+</sup> T cells. Patients' clusters:** CD8<sup>low</sup>, least 25% of CD8<sup>+</sup> T cells percentage; CD8<sup>mid</sup>, 25%-75% of CD8<sup>+</sup> T cells percentage; CD8<sup>high</sup>, last 25% of CD8<sup>+</sup> T cells percentage.
