# Supplementary material for: Spatial Context of Immune Checkpoints as Predictors of Overall Survival in Patients with Resectable Colorectal Cancer Independent of Standard Tumor–Node–Metastasis Stages
Source: PubMed Central journal article supplement (PMC11589669; doi:10.1158/2767-9764.crc-24-0270), 2024-11-26
Supplement: crc-24-0270_figure_s3_suppsf3.pdf [file crc-24-0270_figure_s3_suppsf3.pdf]

Figure S3

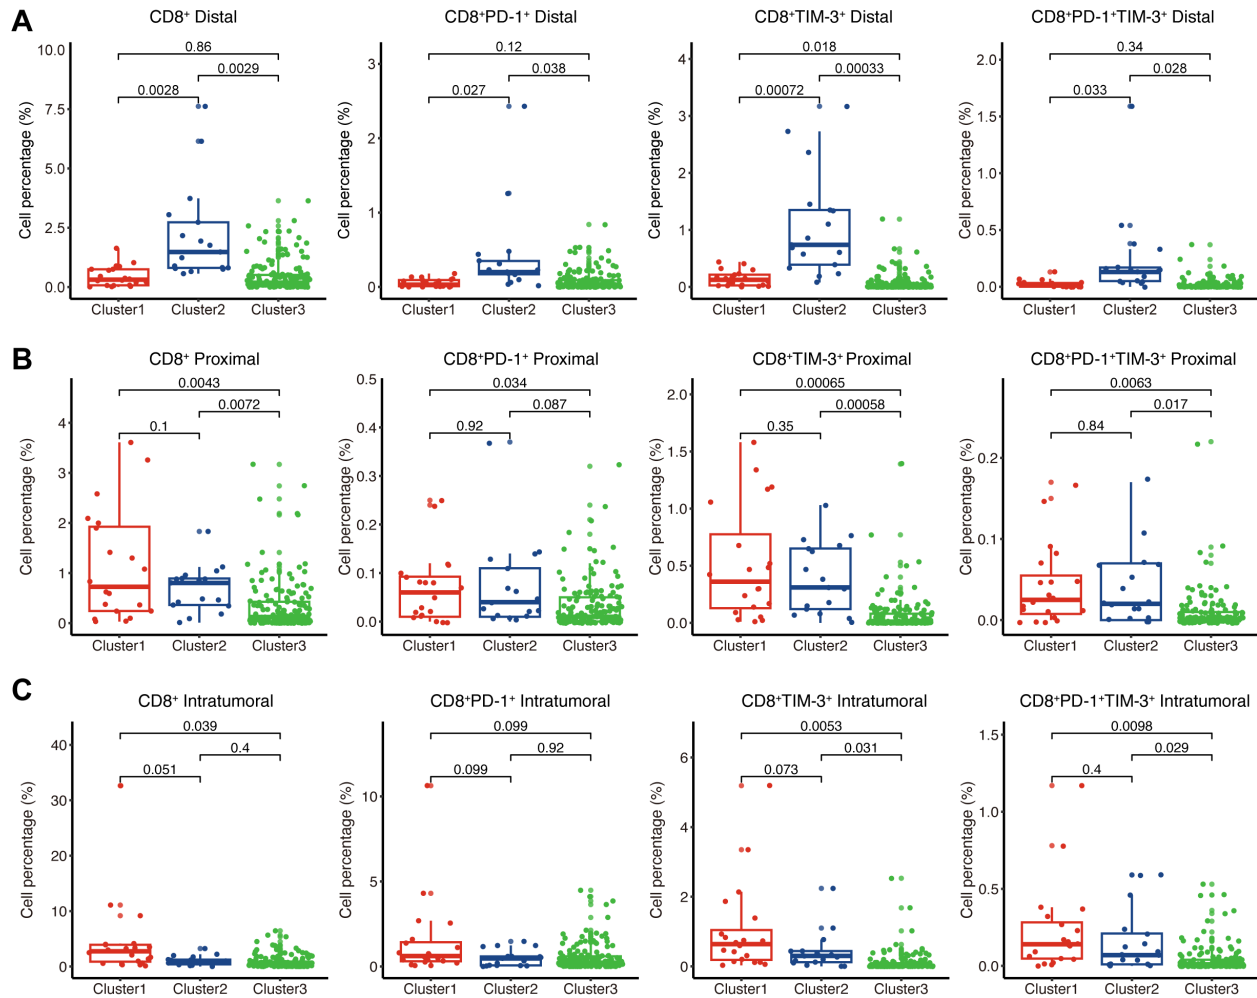

Figure S3

**Comparative analysis of CD8<sup>+</sup> cell subtypes distribution across spatial clusters in unsupervised groupings.** **A**, Boxplots depicting the proportions of distal CD8<sup>+</sup> cells subtype in the groups with unsupervised clusters. Data are determined by wilcoxon test. **B**, Boxplots depicting the proportions of proximal CD8<sup>+</sup> cells subtype in the groups with unsupervised clusters. Data are determined by wilcoxon test. **C**, Boxplots depicting the proportions of intratumoral CD8<sup>+</sup> cells subtype in the groups with unsupervised clusters. Data are determined by wilcoxon test.
