# Supplementary material for: Spatial Context of Immune Checkpoints as Predictors of Overall Survival in Patients with Resectable Colorectal Cancer Independent of Standard Tumor–Node–Metastasis Stages
Source: PubMed Central journal article supplement (PMC11589669; doi:10.1158/2767-9764.crc-24-0270), 2024-11-26
Supplement: crc-24-0270_figure_s4_suppsf4.pdf [file crc-24-0270_figure_s4_suppsf4.pdf]

Figure S4

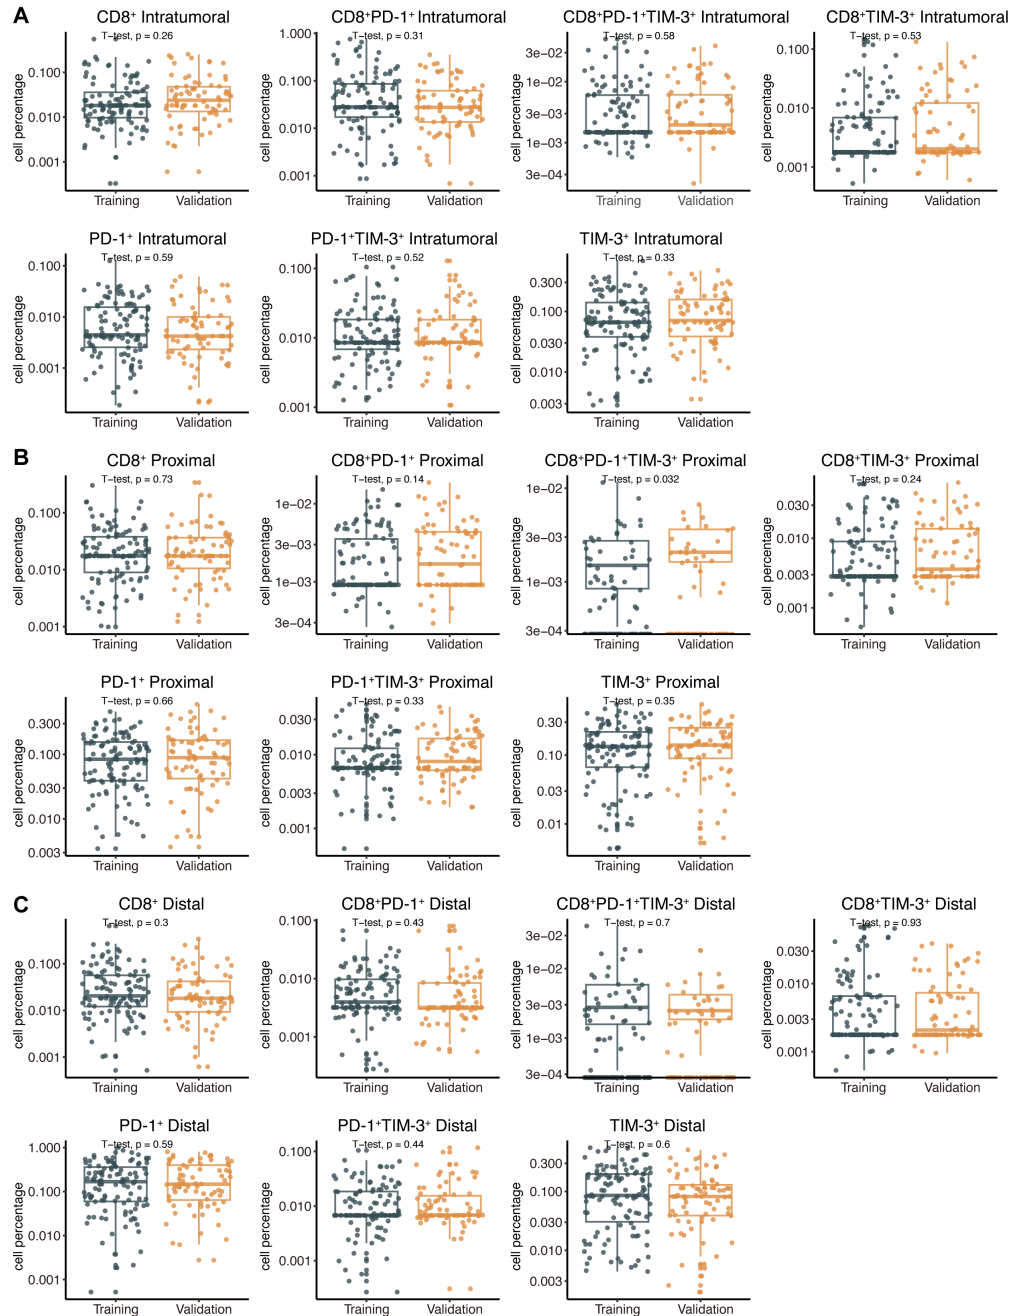

Figure S4

**analysis of immune cell statuses across different tumor locations in training and validation cohorts.**

**A**, Comparison of 7 intratumoral immune cell statuses between training cohort and validation cohort. Data are presented as mean  $\pm$  s.e.m, and determined by two-tailed unpaired t-test. **B**, Comparison of 7 proximal immune cell statuses between training cohort and validation cohort. Data are presented as mean  $\pm$  s.e.m, and determined by two-tailed unpaired t-test. **C**, Comparison of 7 distal immune cell statuses between training cohort and validation cohort. Data are presented as mean  $\pm$  s.e.m, and determined by two-tailed unpaired t-test.
