# Supplementary material for: Spatial Context of Immune Checkpoints as Predictors of Overall Survival in Patients with Resectable Colorectal Cancer Independent of Standard Tumor–Node–Metastasis Stages
Source: PubMed Central journal article supplement (PMC11589669; doi:10.1158/2767-9764.crc-24-0270), 2024-11-26
Supplement: crc-24-0270_figure_s5_suppsf5.pdf [file crc-24-0270_figure_s5_suppsf5.pdf]

Figure S5

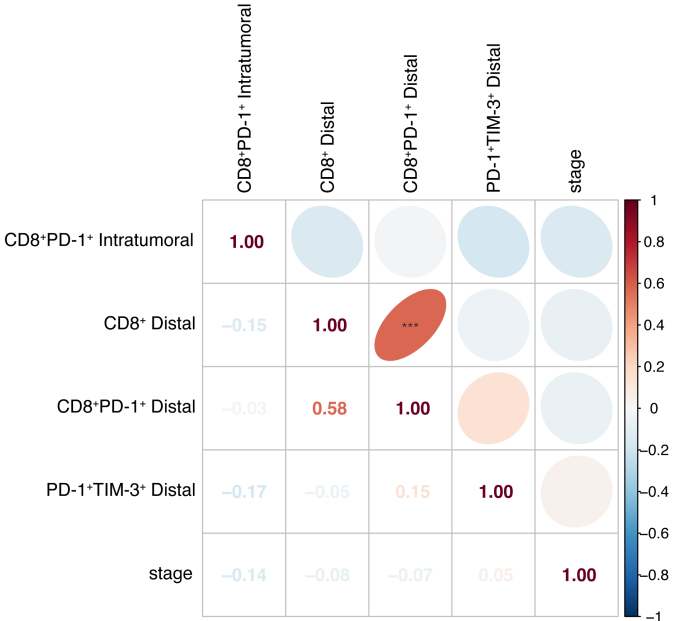

Figure S5

**Pearson correlation of screened factors.** The heatmap displayed a Pearson correlation coefficient matrix for five variables selected via lasso regression. Red denoted a positive correlation and blue indicated a negative correlation.
