# Supplementary material for: Spatial Context of Immune Checkpoints as Predictors of Overall Survival in Patients with Resectable Colorectal Cancer Independent of Standard Tumor–Node–Metastasis Stages
Source: PubMed Central journal article supplement (PMC11589669; doi:10.1158/2767-9764.crc-24-0270), 2024-11-26
Supplement: crc-24-0270_figure_s6_suppsf6.pdf [file crc-24-0270_figure_s6_suppsf6.pdf]

Figure S6

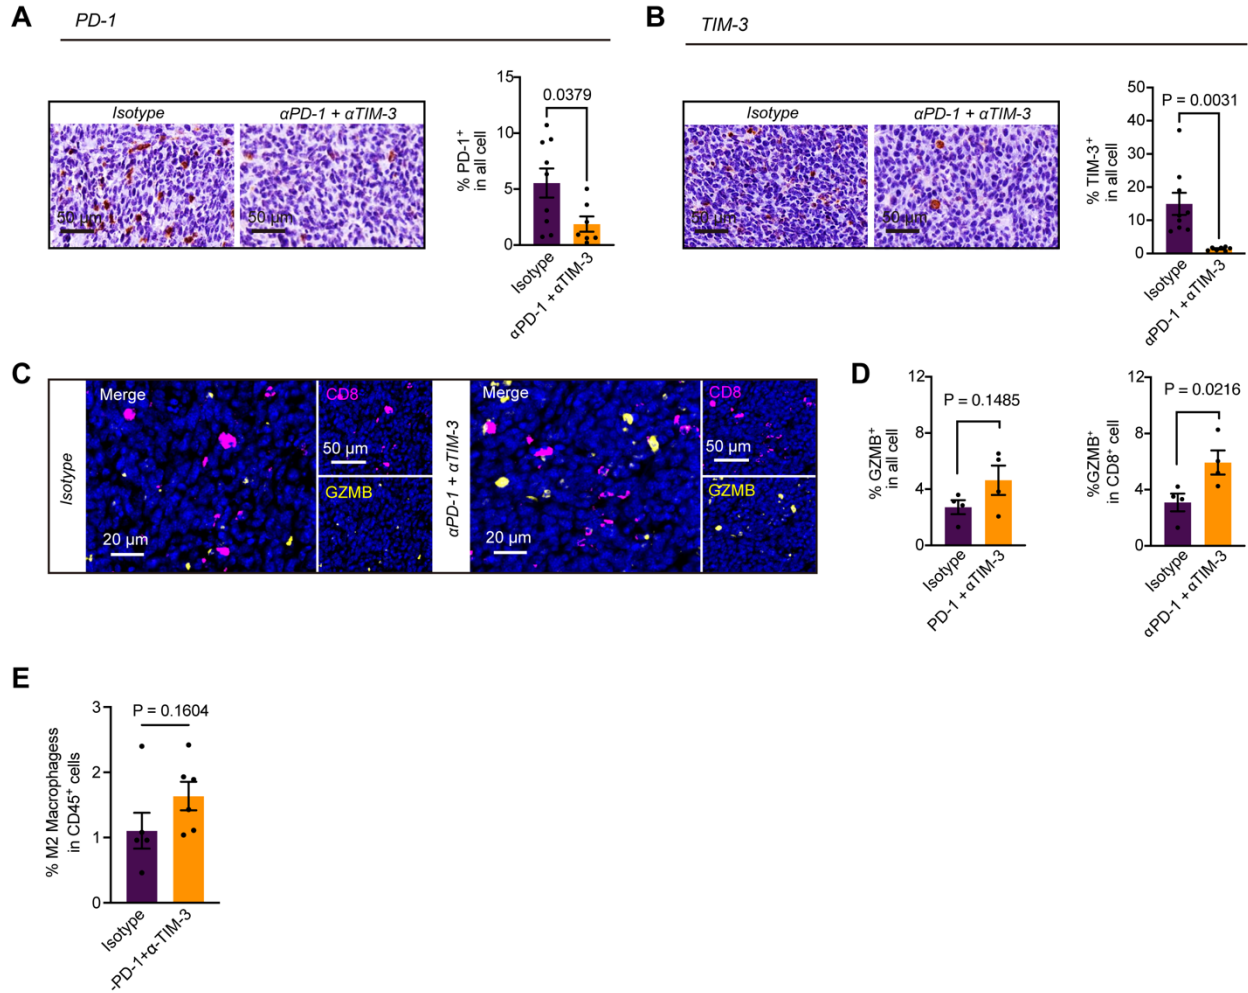

Figure S6

**Immune cell status changes after  $\alpha$ PD-1 +  $\alpha$ TIM-3 treatment.** **A**, Representative immunohistochemistry and quantification for PD-1 protein expression levels in CT26 tumors treated with isotype or  $\alpha$ PD-1 +  $\alpha$ TIM-3. Data are presented as mean  $\pm$  s.e.m, and determined by two-tailed unpaired t-test. **B**, Representative immunohistochemistry and quantification for TIM-3 protein expression levels in CT26 tumors treated with isotype or  $\alpha$ PD-1 +  $\alpha$ TIM-3. Data are presented as mean  $\pm$  s.e.m, and determined by two-tailed unpaired t-test. **C**, Representative image of multiplex immunofluorescence staining (CD8, red; GZMB, yellow) in isotype or  $\alpha$ PD-1 +  $\alpha$ TIM-3 treatment tumor. **D**, mIHC quantification of GZMB<sup>+</sup> cells, GZMB<sup>+</sup> T cells as a percentage of all cells or CD8<sup>+</sup> cells. Data are presented as mean  $\pm$  s.e.m, and determined by two-tailed unpaired t-test. **E**, M2 macrophages are shown as a percentage of CD45<sup>+</sup> cells. The data are presented as the mean  $\pm$  s.e.m, and were analyzed by two-tailed unpaired t-tests.
